# Supplementary material for: Morphology control and interface characteristics of well-dispersed nanomaterials in K-ion batteries
Source: Royal Society of Chemistry journal article supplement (doi:10.1039/d1ra04869d), 2021-01-01
Supplement: d1ra04869d1.pdf [file d1ra04869d1.pdf]

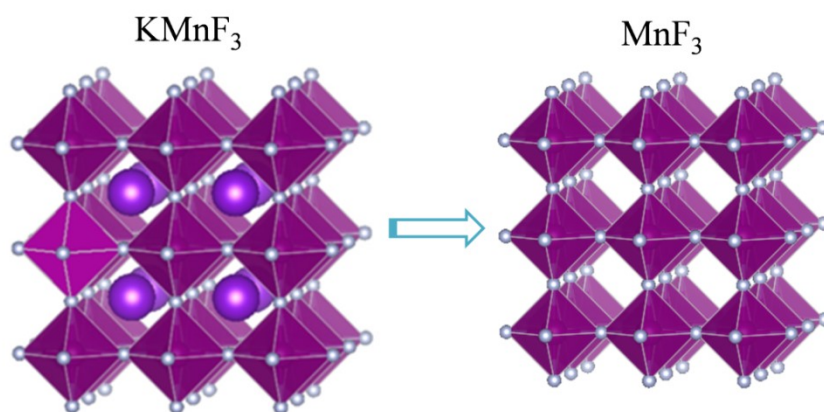

**Figure S1 Demonstration of structural changes from  $\text{KMnF}_3$  to  $\text{MnF}_3$   
Optimization of synthesis conditions and structure and morphology of  $\text{KMnF}_3$**

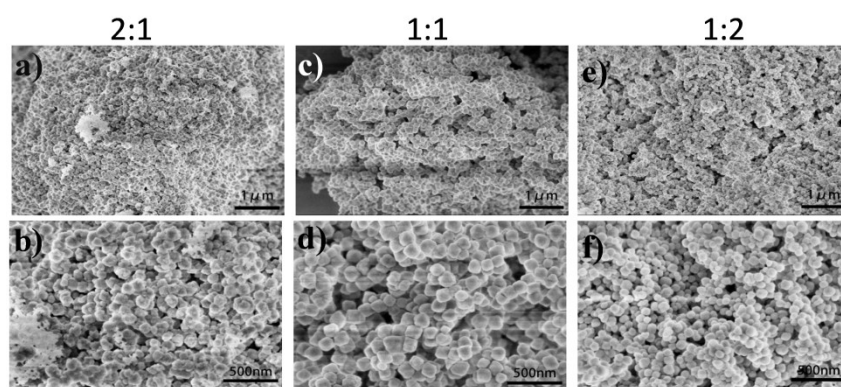

**Figure S2 SEM images of  $\text{KMnF}_3$  prepared in mixed solvents with different ratios of water and ethanol (a, b-2:1, c, d-2:1, e, f-1:2)**

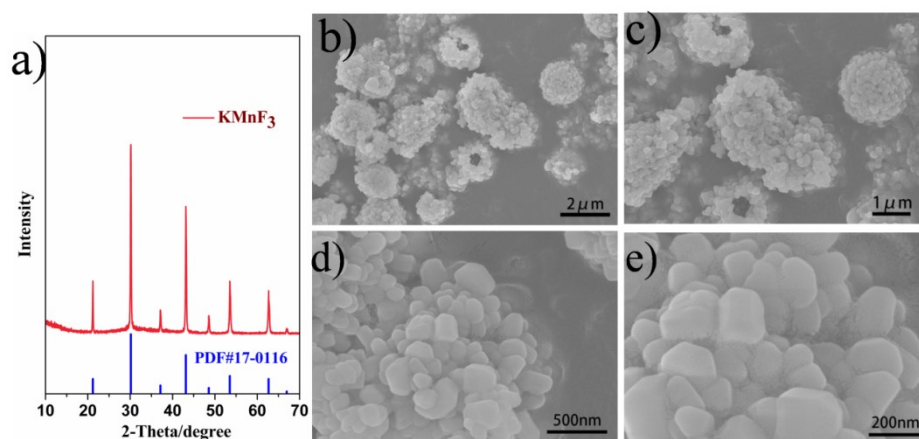

**Figure S3 XRD and SEM image of  $\text{KMnF}_3$  prepared by rapid pouring**

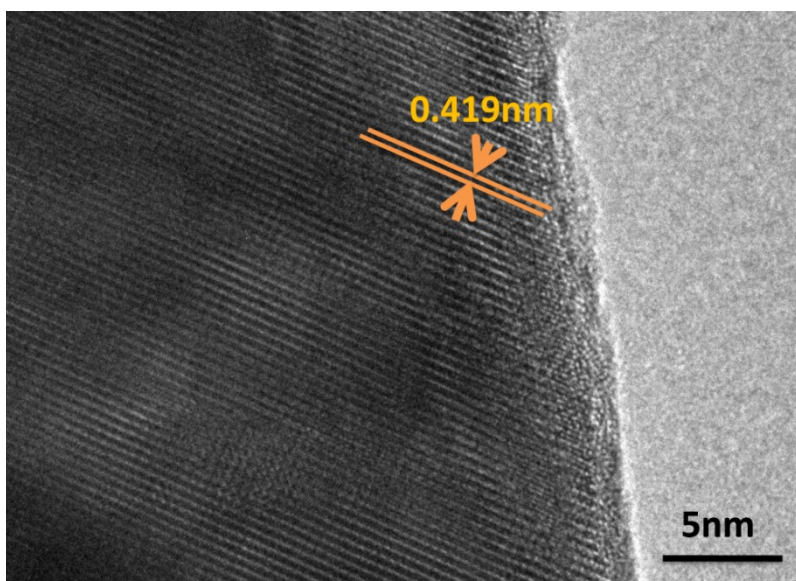

Figure S4 HRTEM analysis of the KMnF<sub>3</sub> material

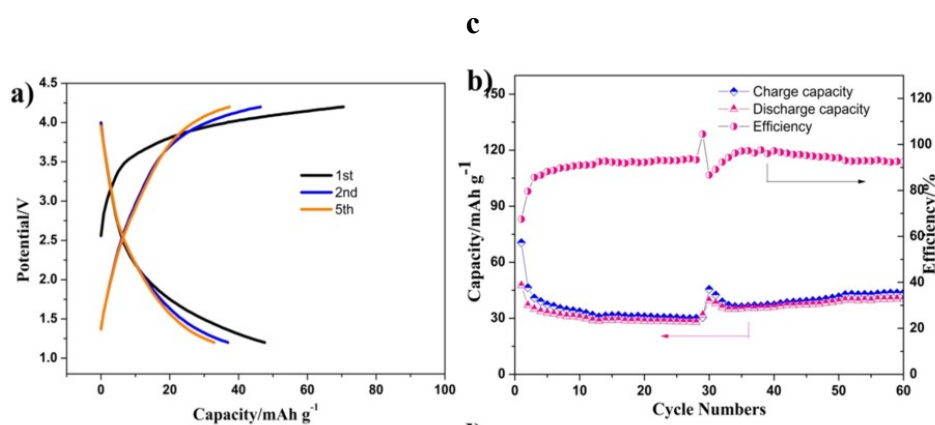

Figure S5 Discharge/charge profiles of of KMnF<sub>3</sub>cathode at the current density of 40 mA·g<sup>-1</sup> over the voltage range of 4.2–1.2V vs. K<sup>+</sup>/K

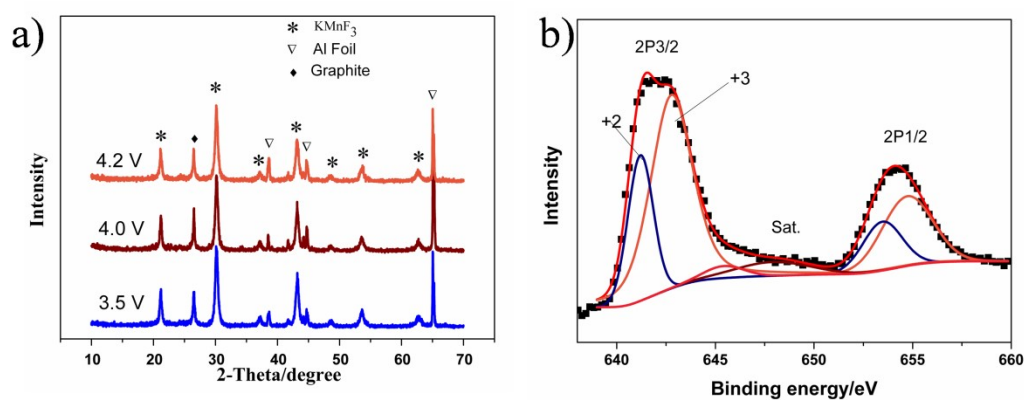

Figure S6 a)XRD patterns of the cathode at different voltages during the first charge. b)

### XPS spectrum of electrode pad after the first charge

Table S1 Comparison of potentials of manganese-based electrode materials in KIBS

| electrode                                       | The highest working voltage/ V vs K <sup>+</sup> /K |
|-------------------------------------------------|-----------------------------------------------------|
| K <sub>0.3</sub> MnO <sub>2</sub> <sup>17</sup> | 3.9                                                 |
| K <sub>0.5</sub> MnO <sub>2</sub> <sup>18</sup> | 4.0                                                 |
| this work                                       | 4.2                                                 |

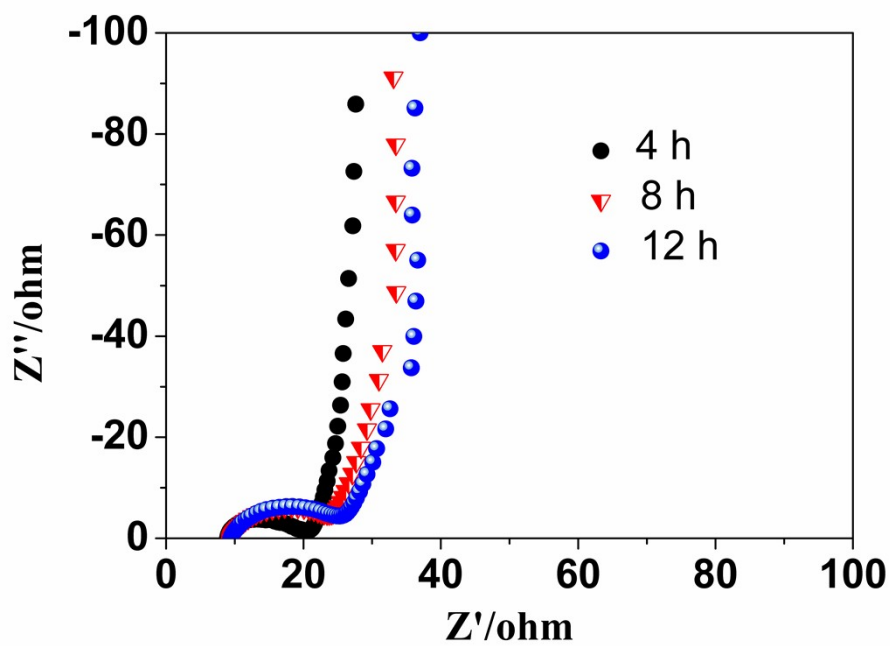

Figure S7 EIS with different self-discharge time

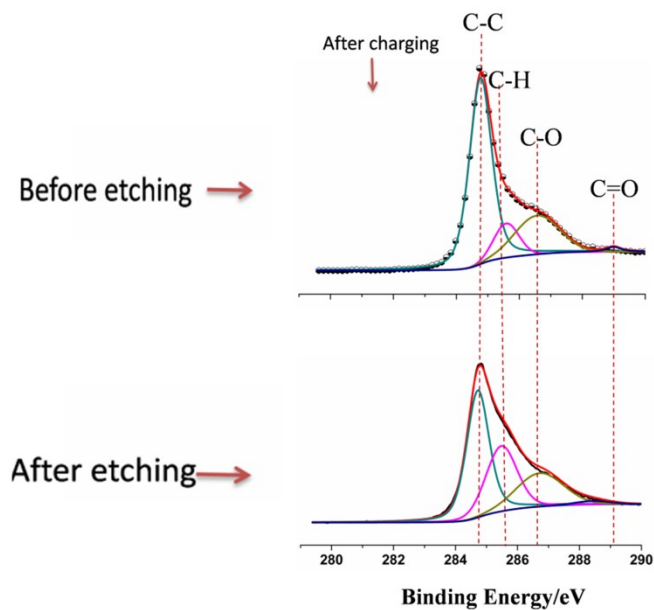

Figure S8 Comparison of XPS test of electrode pad before and after etching

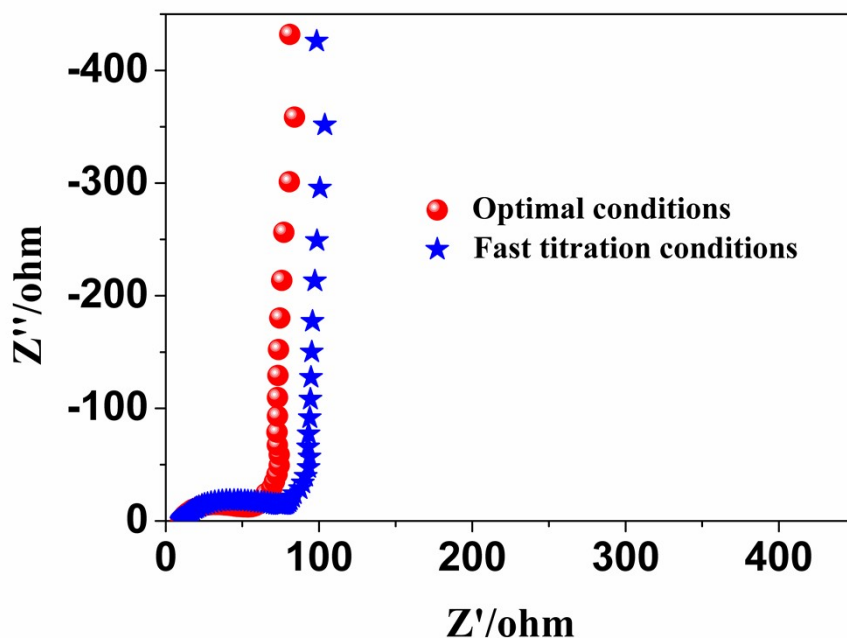

Figure S9 Comparison of EIS of  $\text{KMnF}_3$  electrodes synthesized under optimal conditions and rapid tidings conditions after the initial charge and discharge process

Table S2 ICP-OES test results of the manganese content in the electrolyte after the first cycle of charge and discharge of the  $\text{KMnF}_3$  electrode synthesized under the optimal conditions and rapid titration conditions.

---

| electrode                                                        | The concentration of manganese ions in<br>the electrolyte/mg L <sup>-1</sup> |
|------------------------------------------------------------------|------------------------------------------------------------------------------|
| KMnF <sub>3</sub> synthesized under optimized<br>conditions      | 0.023                                                                        |
| KMnF <sub>3</sub> synthesized under fast titration<br>conditions | 0.041                                                                        |

---
